# Supplementary material
Source: PubMed Central journal article supplement (PMC4433763)

**Supplementary data.**

**FIGURE S1. Basal ROS production is increased in *mdx* myotubes.** Cells were preloaded with CM-H<sub>2</sub>DCFDA 30 minutes before recording under non-stimulated conditions. Slope quantification of CM-DCFDA fluorescent signal in both *wt* and *mdx* myotubes (n=10 and n=4 cells, for ROIs and cells respectively, 3 different preparations is shown).

**FIGURE S2. LPS stimulation increases NF- $\kappa$ B activity and IL-6 mRNA levels in both *wt* and *mdx* myotubes.** **A.** NF- $\kappa$ B activity was assessed with luciferase reporters after 12 h (n=6). **B.** IL-6 mRNA levels was measures by real time PCR after 2h (n=4). \*\*= $P$ <0.01, \*\*\*= $P$ <0.001 (indicated or versus basal *wt* value).

**Figure S1**

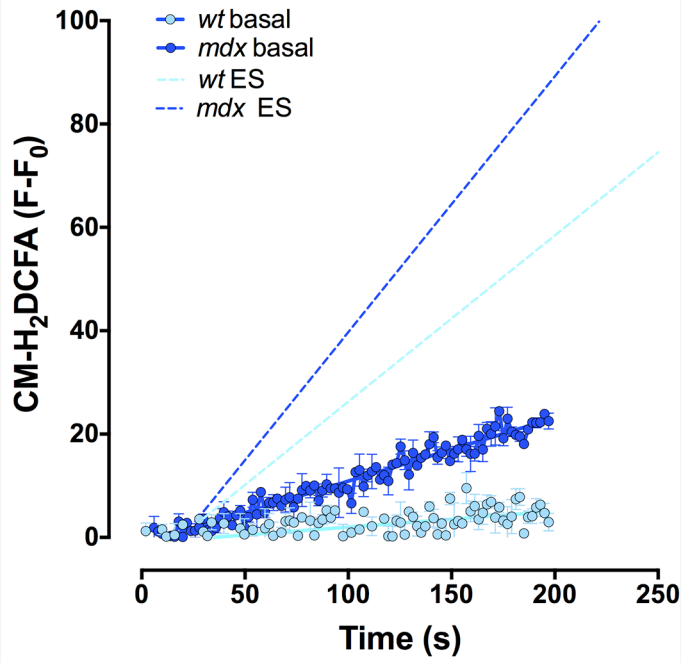

**Figure S2**

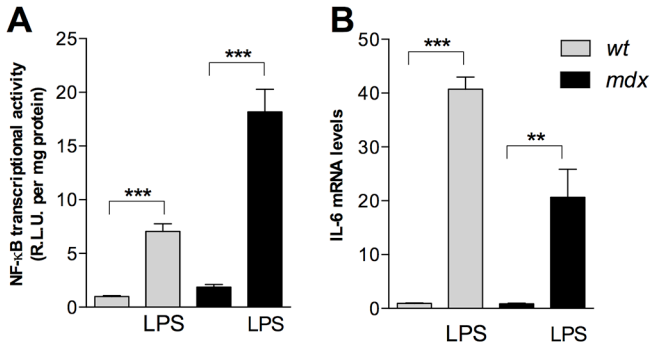

Supplement: NIHMS686107-supplement-01.pdf [file NIHMS686107-supplement-01.pdf]
